# Supplementary material for: Long non-coding RNA PVT1 promotes tumor progression by regulating the miR-143/HK2 axis in gallbladder cancer
Source: PubMed Central journal article supplement (PMC6397746; doi:10.1186/s12943-019-0947-9), 2019-03-02

Additional file 8

**Figure S4.** RIP assay confirmed that miR-143 was a target of PVT1. **(a-b)**

The correlation among PVT1, miR-143 and Ago2 was determined by analyzing GBC-SD and NOZ cell lysates utilizing RIP with an Ago2 antibody. **(c-d)** qPCR was performed to detect the PVT1 level in the substrate of RIP assay in miR-143-overexpressing GBC cells. **(e)** Detection of PVT1 using qPCR in the sample pulled down by biotinylated PVT1 and negative control (NC) probe. **(f)** Detection of miR-143 using qPCR in the same sample pulled down by biotinylated PVT1 and NC probe. Input was used for normalization. \*P < 0.05, \*\*P < 0.01, \*\*\*P < 0.001. Error bars indicate mean ± SD.

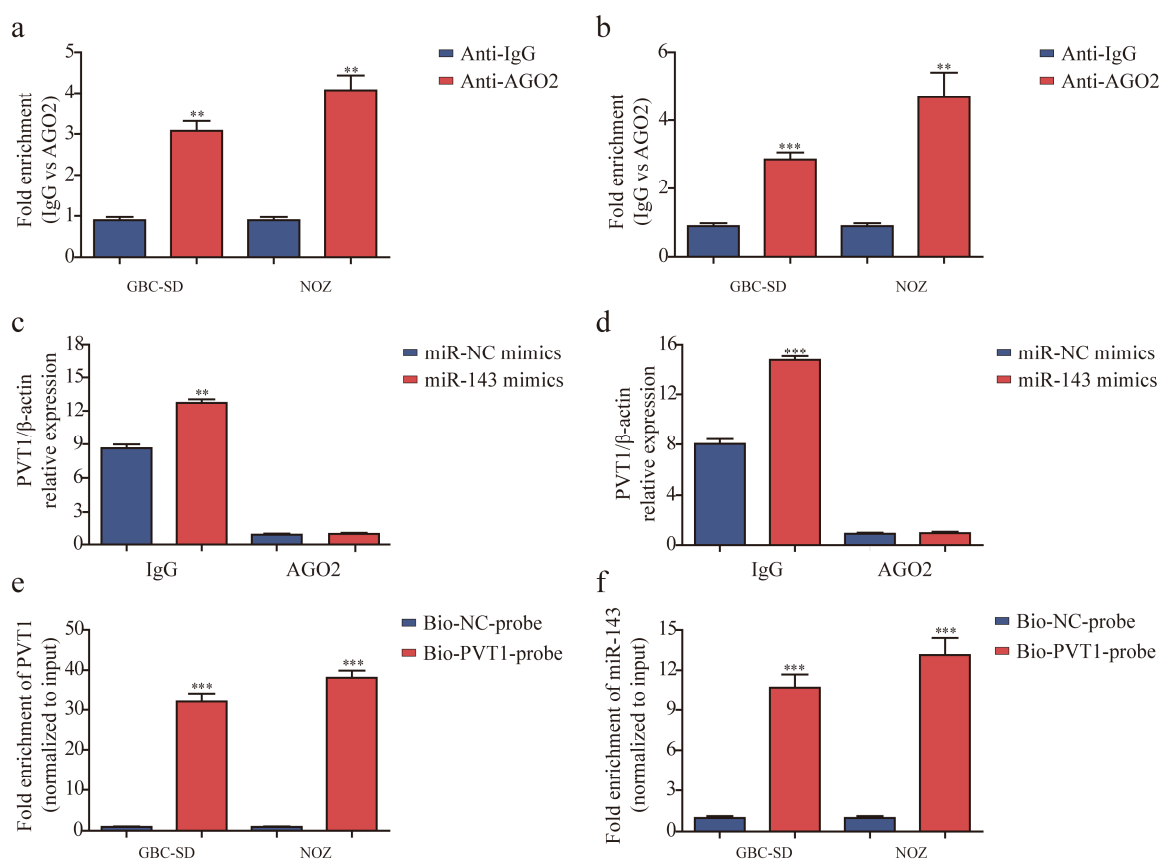

Supplement: 12943_2019_947_MOESM8_ESM.pdf [file 12943_2019_947_MOESM8_ESM.pdf]
