# Supplementary material for: RETRACTED ARTICLE: Long non-coding RNA PVT1 promotes tumor progression by regulating the miR-143/HK2 axis in gallbladder cancer
Source: Springer Nature journal article supplement (doi:10.1186/s12943-019-0947-9), 2019-03-02
Supplement: MOESM1 [file 16522036]

Additional file 1

**Table S1.** Primer sequence used in this study

| Name | Direction | Primer(5'-3') |
| --- | --- | --- |
| PVT1 | Forward | 5'-TGAGAACTGTCCTTACGTGACC-3' |
|  | Reverse | 5'-AGAGCACCAAGACTGGCTCT-3' |
| miR-143 | Forward | 5'-AGTGCGTGTCGTGGTGT-3' |
|  | Reverse | 5'-GCCTGAGATGAAGCACGTG-3' |
| HK2 | Forward | 5′-CAAAGTGACAGTGGGTGTGG-3′ |
|  | Reverse | 5′-GCCAGGTCCTTCACTGTCTC-3′ |
| β-actin | Forward | 5'- CATGTACGTTGCTATCCAGGC -3' |
|  | Reverse | 5'- CCTTAATGTCACGCACGAT-3' |
| U6 | Forward | 5′-GCTTCGGCAGCACATATACTAAAAT-3′ |
|  | Reverse | 5′-CGCTTCACGAATTTGCGTGTCAT-3′ |
