# Supplementary material for: RETRACTED ARTICLE: Long non-coding RNA PVT1 promotes tumor progression by regulating the miR-143/HK2 axis in gallbladder cancer
Source: Springer Nature journal article supplement (doi:10.1186/s12943-019-0947-9), 2019-03-02

### Additional file 3

**Figure S1.** Expression and subcellular location of PVT1 in human GBC cell lines. **(a)** PVT1 expression was significantly higher in GBC cells compared with the human gallbladder epithelium cell line H69. **(b-c)** nucleus and cytoplasm segmentation assay to determine the PVT1 expression in GBC-SD cells and NOZ cells. **(d)** Localization of PVT1 by RNA-FISH in GBC-SD and NOZ cells. Nuclei are stained blue (DAPI) and PVT1 is stained red (magnification,  $\times 200$ , scale bar,  $50\ \mu\text{m}$ ). \* $P < 0.05$ , \*\* $P < 0.01$ , \*\*\* $P < 0.001$ . Error bars indicate mean  $\pm$  SD.

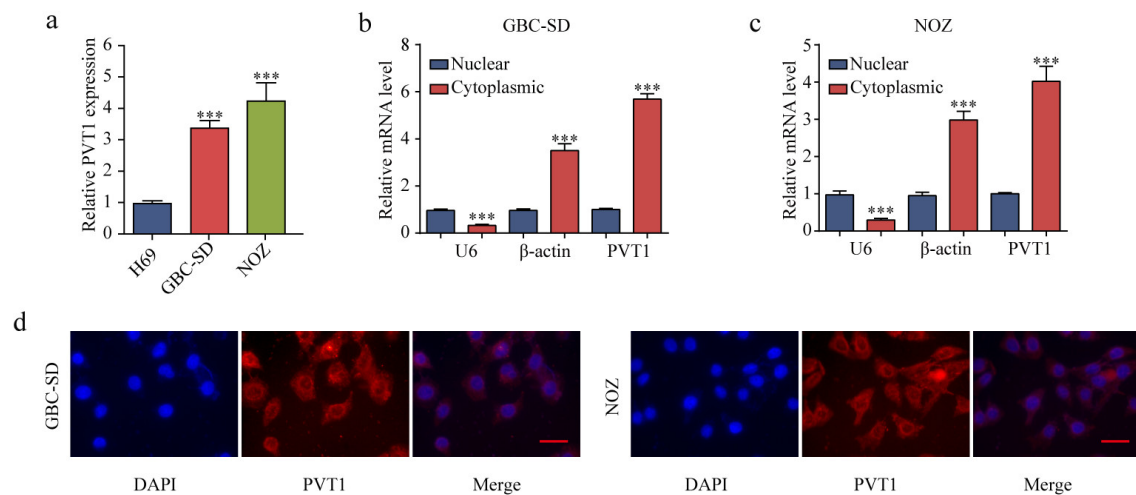

Supplement: MOESM3 [file 16522036]
