# Supplementary material for: RETRACTED ARTICLE: Long non-coding RNA PVT1 promotes tumor progression by regulating the miR-143/HK2 axis in gallbladder cancer
Source: Springer Nature journal article supplement (doi:10.1186/s12943-019-0947-9), 2019-03-02

## Additional file 4

**Figure S2.** The related protein levels of cell proliferation, migration and invasion were reduced after PVT1 knockdown. **(a-b)** The protein expression of CDK4, CDK6, Ki-67, and PCNA was examined by western blot, and the relative protein expression was shown in histogram normalized to  $\beta$ -actin. **(c-d)** MMP-2 and MMP-9 levels were detected by western blot, and the relative protein expression was shown in histogram normalized to  $\beta$ -actin. **(e-f)** Validation of the relationship between PVT1 and the related protein levels of cell proliferation, migration and invasion through GSE76633 dataset. \* $P < 0.05$ , \*\* $P < 0.01$ , \*\*\* $P < 0.001$ . Error bars indicate mean  $\pm$  SD.

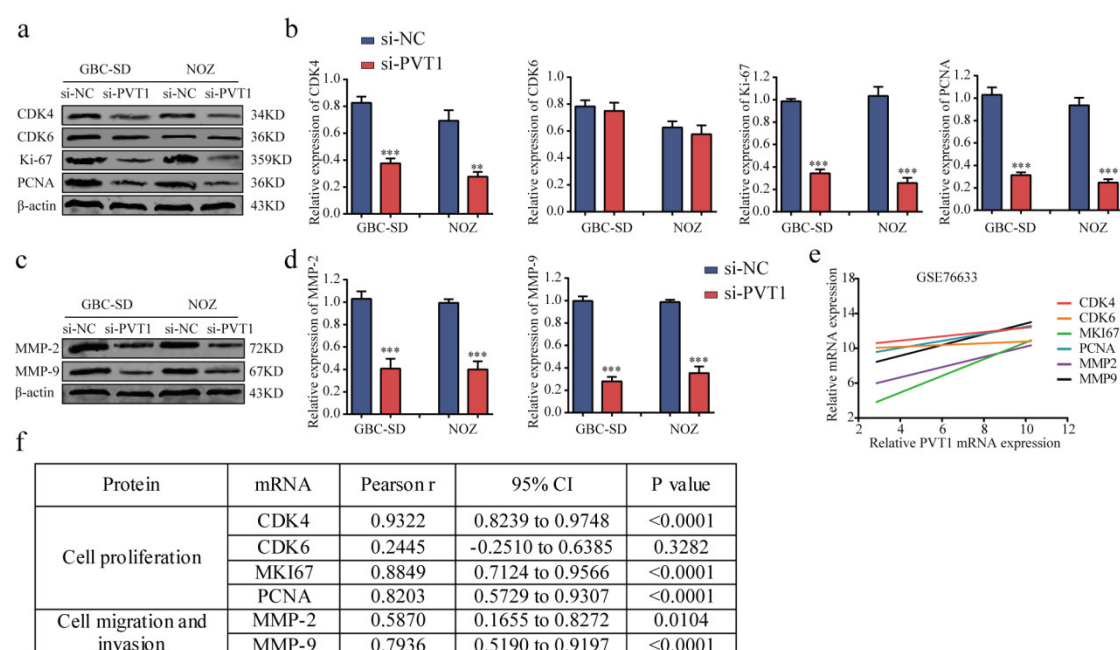

Supplement: MOESM4 [file 16522036]
