# Supplementary material for: RETRACTED ARTICLE: Long non-coding RNA PVT1 promotes tumor progression by regulating the miR-143/HK2 axis in gallbladder cancer
Source: Springer Nature journal article supplement (doi:10.1186/s12943-019-0947-9), 2019-03-02

Additional file 9

**Figure S5.** The levels of PVT1 in GBC-SD and NOZ cell lines after transfection with lenti-sh-PVT1 or lenti-PVT1 and their corresponding control. **(a)** The PVT1 expression was significantly decreased in both GBC-SD and NOZ cell lines after transfection with lenti-sh-PVT1. **(b)** The PVT1 expression was significantly increased in GBC-SD cells after transfection with lenti-PVT1. \* $P < 0.05$ , \*\* $P < 0.01$ , \*\*\* $P < 0.001$ . Error bars indicate mean  $\pm$  SD.

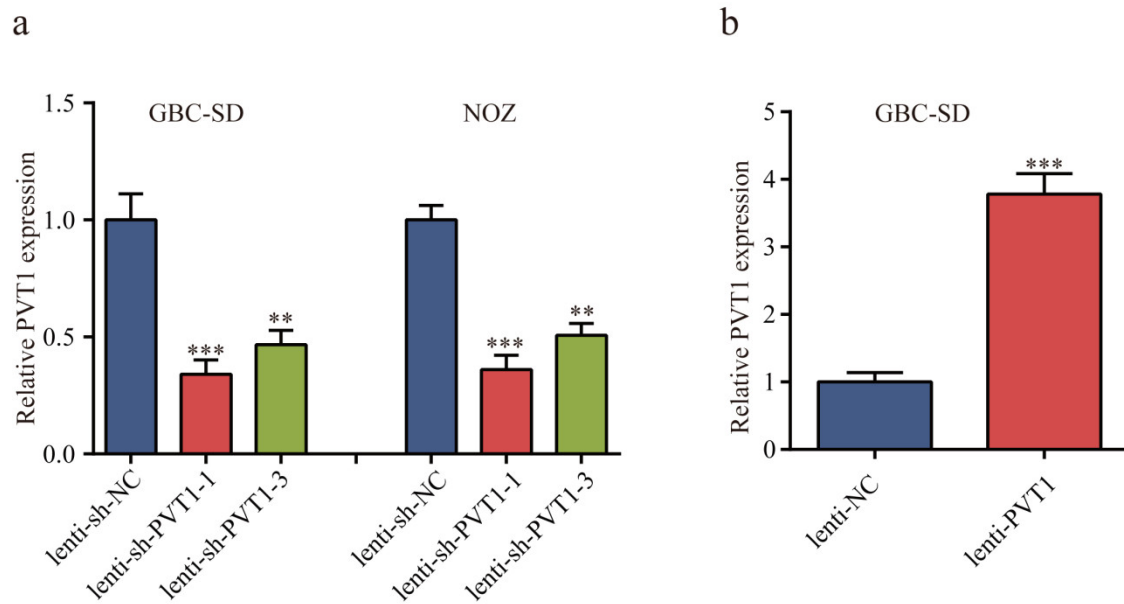

Supplement: MOESM9 [file 16522036]
