# Supplementary figures and images for: Long non-coding RNA PVT1 promotes tumor progression by regulating the miR-143/HK2 axis in gallbladder cancer
Source: PubMed Central journal article supplement (PMC6397746; doi:10.1186/s12943-019-0947-9), 2019-03-02

Additional file 7

**Figure S3.** Top 10 downregulated miRNAs in GSE104165 cohort.

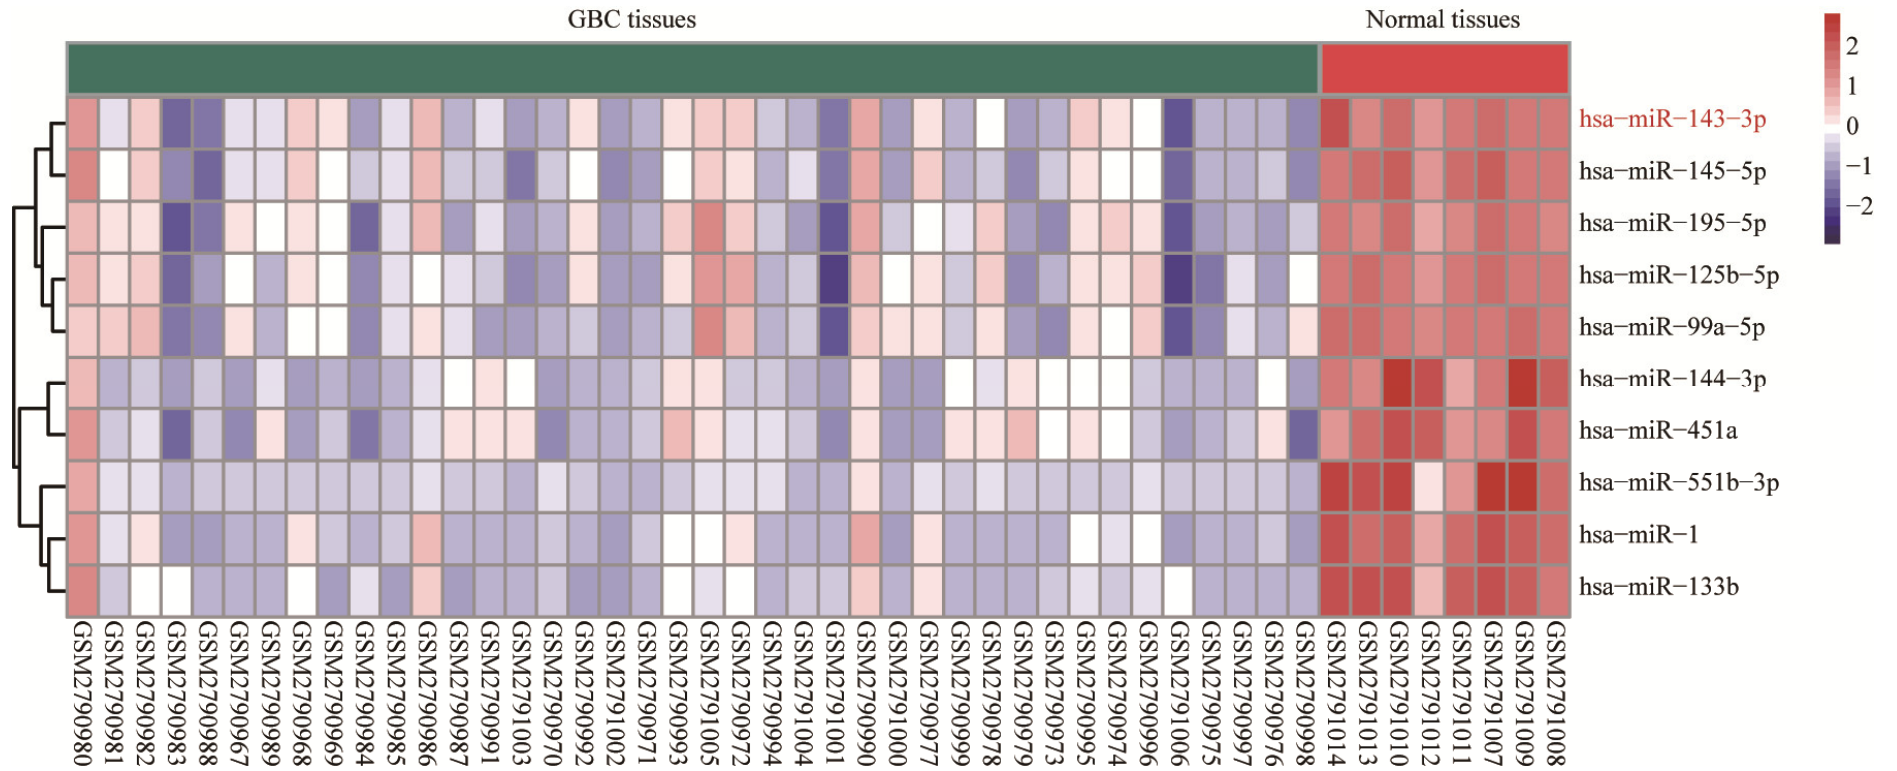

Supplement: 12943_2019_947_MOESM7_ESM.pdf [file 12943_2019_947_MOESM7_ESM.pdf]
